# Supplementary material for: Associations Between the Purinergic Receptor P2X7 and Leprosy Disease
Source: Front Genet. 2021 Nov 2;12:730991. doi: 10.3389/fgene.2021.730991 (PMC8593470; doi:10.3389/fgene.2021.730991)
Supplement: Supplementary Dataset 1 — Samples. [file Data_Sheet_1.xlsx]

## Sheet: Control samples
AvgSpotLen	BioProject	BioSample	Center_Name	DATASTORE_filetype	DATASTORE_provider	DATASTORE_region	Experiment	InsertSize	Instrument	LibraryLayout	LibrarySelection	LibrarySource	Library_Name	LoadDate	MBases	MBytes	Organism	Platform	ReleaseDate	Run	SRA_Sample	SRA_Study	Sample_Name	source_name	tissue	tissue_type	Assay_Type	Consent
18	PRJNA276463	SAMN03375358	GEO	sra	ncbi		SRX890504	0	Illumina HiSeq 2000	SINGLE	cDNA	TRANSCRIPTOMIC		2015-02-25	185	137	Homo sapiens	ILLUMINA	2015-05-28	SRR1818563	SRS857273	SRP055513	GSM1619207	Fetal tissue	skin		RNA-Seq	public
18	PRJNA276463	SAMN03375265	GEO	sra	sra-sos	sra-sos.public	SRX890529	0	Illumina HiSeq 2000	SINGLE	cDNA	TRANSCRIPTOMIC		2015-02-25	31	26	Homo sapiens	ILLUMINA	2015-05-28	SRR1818588	SRS857253	SRP055513	GSM1619232	Fetal tissue	skin		RNA-Seq	public
202	PRJNA301173	SAMN04240842	GEO	sra	ncbi		SRX1418704	0	Illumina HiSeq 2500	PAIRED	cDNA	TRANSCRIPTOMIC		2015-11-20	7316	5033	Homo sapiens	ILLUMINA	2015-12-24	SRR2926016	SRS1152655	SRP065812	GSM1930367	Normal Skin		normal skin	RNA-Seq	public
202	PRJNA301173	SAMN04240843	GEO	sra	ncbi		SRX1418705	0	Illumina HiSeq 2500	PAIRED	cDNA	TRANSCRIPTOMIC		2015-11-20	7143	4886	Homo sapiens	ILLUMINA	2015-12-24	SRR2926017	SRS1152654	SRP065812	GSM1930368	Normal Skin		normal skin	RNA-Seq	public
202	PRJNA301173	SAMN04240844	GEO	sra	ncbi		SRX1418706	0	Illumina HiSeq 2500	PAIRED	cDNA	TRANSCRIPTOMIC		2015-11-20	8075	5544	Homo sapiens	ILLUMINA	2015-12-24	SRR2926018	SRS1152653	SRP065812	GSM1930369	Normal Skin		normal skin	RNA-Seq	public
202	PRJNA301173	SAMN04240847	GEO	sra	ncbi		SRX1418709	0	Illumina HiSeq 2500	PAIRED	cDNA	TRANSCRIPTOMIC		2015-11-20	11122	7328	Homo sapiens	ILLUMINA	2015-12-24	SRR2926021	SRS1152650	SRP065812	GSM1930372	Normal Skin		normal skin	RNA-Seq	public
202	PRJNA301173	SAMN04240849	GEO	sra	ncbi		SRX1418711	0	Illumina HiSeq 2500	PAIRED	cDNA	TRANSCRIPTOMIC		2015-11-20	9328	6117	Homo sapiens	ILLUMINA	2015-12-24	SRR2926023	SRS1152647	SRP065812	GSM1930374	Normal Skin		normal skin	RNA-Seq	public
202	PRJNA301173	SAMN04240850	GEO	sra	ncbi		SRX1418712	0	Illumina HiSeq 2500	PAIRED	cDNA	TRANSCRIPTOMIC		2015-11-20	8758	5739	Homo sapiens	ILLUMINA	2015-12-24	SRR2926024	SRS1152649	SRP065812	GSM1930375	Normal Skin		normal skin	RNA-Seq	public
202	PRJNA301173	SAMN04240854	GEO	sra	ncbi		SRX1418716	0	Illumina HiSeq 2500	PAIRED	cDNA	TRANSCRIPTOMIC		2015-11-20	9502	6211	Homo sapiens	ILLUMINA	2015-12-24	SRR2926028	SRS1152644	SRP065812	GSM1930379	Normal Skin		normal skin	RNA-Seq	public
202	PRJNA301173	SAMN04240855	GEO	sra	ncbi		SRX1418717	0	Illumina HiSeq 2500	PAIRED	cDNA	TRANSCRIPTOMIC		2015-11-20	10861	6741	Homo sapiens	ILLUMINA	2015-12-24	SRR2926029	SRS1152642	SRP065812	GSM1930380	Normal Skin		normal skin	RNA-Seq	public
202	PRJNA301173	SAMN04240857	GEO	sra	sra-sos	sra-sos.public	SRX1418719	0	Illumina HiSeq 2500	PAIRED	cDNA	TRANSCRIPTOMIC		2015-11-19	8222	5409	Homo sapiens	ILLUMINA	2015-12-24	SRR2926031	SRS1152639	SRP065812	GSM1930382	Normal Skin		normal skin	RNA-Seq	public
101	PRJNA30709	SAMN04284304	GEO	sra unknown_contigs	ncbi sra-sos	sra-sos.public	SRX1602987	0	Illumina HiSeq 2000	SINGLE	cDNA	TRANSCRIPTOMIC		2016-02-27	7699	5052	Homo sapiens	ILLUMINA	2016-03-29	SRR3191763	SRS1312928	SRP013565	ENCODE biosample ENCBS069RNA		skin of body		RNA-Seq	public
36	PRJNA30709	SAMN00829014	GEO	sra	sra-sos	sra-sos.public	SRX130228	0	Illumina Genome Analyzer II	SINGLE	cDNA	TRANSCRIPTOMIC	GSM897077: CSHL_RnaSeq_BJ_cell_TAP-Only_shortTotal	2012-08-11	1023	704	Homo sapiens	ILLUMINA	2012-03-19	SRR446315	SRS301468	SRP003754	GSM897077	BJ			RNA-Seq	public
36	PRJNA30709	SAMN00829014	GEO	sra	sra-sos	sra-sos.public	SRX130228	0	Illumina Genome Analyzer II	SINGLE	cDNA	TRANSCRIPTOMIC	GSM897077: CSHL_RnaSeq_BJ_cell_TAP-Only_shortTotal	2012-08-11	989	680	Homo sapiens	ILLUMINA	2012-03-19	SRR446316	SRS301468	SRP003754	GSM897077	BJ			RNA-Seq	public

## Sheet: Lesions samples
BioSample	Experiment	MBases	MBytes	Run	SRA_Sample	Sample_Name	age	diagnosis	host_gender	Assay_Type	AvgSpotLen	BioProject	Center_Name	Consent	DATASTORE_filetype	DATASTORE_provider	InsertSize	Instrument	LibraryLayout	LibrarySelection	LibrarySource	LoadDate	Organism	Platform	ReleaseDate	SRA_Study	source_name	tissue
SAMN10851182	SRX5314668	4009	3000	SRR8511021	SRS4311535	GSM3585528	46	Lepromatous leprosy (LL)	male	RNA-Seq	51	PRJNA518047	GEO	public	sra	ncbi	0	Illumina HiSeq 2000	SINGLE	cDNA	TRANSCRIPTOMIC	2019-01-31	Mycobacterium leprae	ILLUMINA	2019-03-26	SRP183028	skin	skin
SAMN10851181	SRX5314669	4940	3339	SRR8511022	SRS4311536	GSM3585529	26	Lepromatous leprosy (LL)	male	RNA-Seq	51	PRJNA518047	GEO	public	sra	ncbi	0	Illumina HiSeq 2000	SINGLE	cDNA	TRANSCRIPTOMIC	2019-01-31	Mycobacterium leprae	ILLUMINA	2019-03-26	SRP183028	skin	skin
SAMN10851180	SRX5314670	5615	3860	SRR8511023	SRS4311537	GSM3585530	53	Lepromatous leprosy (LL)	male	RNA-Seq	51	PRJNA518047	GEO	public	sra	ncbi	0	Illumina HiSeq 2000	SINGLE	cDNA	TRANSCRIPTOMIC	2019-01-31	Mycobacterium leprae	ILLUMINA	2019-03-26	SRP183028	skin	skin
SAMN10851179	SRX5314671	5260	3541	SRR8511024	SRS4311538	GSM3585531	68	Lepromatous leprosy (LL)	female	RNA-Seq	51	PRJNA518047	GEO	public	sra	ncbi	0	Illumina HiSeq 2000	SINGLE	cDNA	TRANSCRIPTOMIC	2019-01-31	Mycobacterium leprae	ILLUMINA	2019-03-26	SRP183028	skin	skin
SAMN10851178	SRX5314672	6469	4761	SRR8511025	SRS4311539	GSM3585532	28	Lepromatous leprosy (LL)	male	RNA-Seq	51	PRJNA518047	GEO	public	sra	ncbi	0	Illumina HiSeq 2000	SINGLE	cDNA	TRANSCRIPTOMIC	2019-01-31	Mycobacterium leprae	ILLUMINA	2019-03-26	SRP183028	skin	skin
SAMN10851177	SRX5314673	7339	5621	SRR8511026	SRS4311540	GSM3585533	22	Lepromatous leprosy (LL)	male	RNA-Seq	51	PRJNA518047	GEO	public	sra	ncbi	0	Illumina HiSeq 2000	SINGLE	cDNA	TRANSCRIPTOMIC	2019-01-31	Mycobacterium leprae	ILLUMINA	2019-03-26	SRP183028	skin	skin
SAMN10851176	SRX5314674	5150	3498	SRR8511027	SRS4311541	GSM3585534	NA	Lepromatous leprosy (LL)		RNA-Seq	51	PRJNA518047	GEO	public	sra	ncbi	0	Illumina HiSeq 2000	SINGLE	cDNA	TRANSCRIPTOMIC	2019-01-31	Mycobacterium leprae	ILLUMINA	2019-03-26	SRP183028	skin	skin
SAMN10851175	SRX5314675	4455	2973	SRR8511028	SRS4311542	GSM3585535	NA	Lepromatous leprosy (LL)		RNA-Seq	51	PRJNA518047	GEO	public	sra	ncbi	0	Illumina HiSeq 2000	SINGLE	cDNA	TRANSCRIPTOMIC	2019-01-31	Mycobacterium leprae	ILLUMINA	2019-03-26	SRP183028	skin	skin
SAMN10851174	SRX5314676	5054	3737	SRR8511029	SRS4311543	GSM3585536	NA	Lepromatous leprosy (LL)		RNA-Seq	51	PRJNA518047	GEO	public	sra	ncbi	0	Illumina HiSeq 2000	SINGLE	cDNA	TRANSCRIPTOMIC	2019-01-31	Mycobacterium leprae	ILLUMINA	2019-03-26	SRP183028	skin	skin
SAMN10851173	SRX5314677	5228	3454	SRR8511030	SRS4311544	GSM3585537	NA	Lepromatous leprosy (LL)		RNA-Seq	51	PRJNA518047	GEO	public	sra	ncbi	0	Illumina HiSeq 2000	SINGLE	cDNA	TRANSCRIPTOMIC	2019-01-31	Mycobacterium leprae	ILLUMINA	2019-03-26	SRP183028	skin	skin
SAMN10851162	SRX5314688	4493	2871	SRR8511041	SRS4311555	GSM3585548	36	Tuberculoid Leprosy (TL)	female	RNA-Seq	51	PRJNA518047	GEO	public	sra	ncbi	0	Illumina HiSeq 2000	SINGLE	cDNA	TRANSCRIPTOMIC	2019-01-31	Mycobacterium leprae	ILLUMINA	2019-03-26	SRP183028	skin	skin
SAMN10851161	SRX5314689	5190	3489	SRR8511042	SRS4311556	GSM3585549	49	Tuberculoid Leprosy (TL)	male	RNA-Seq	51	PRJNA518047	GEO	public	sra	ncbi	0	Illumina HiSeq 2000	SINGLE	cDNA	TRANSCRIPTOMIC	2019-01-31	Mycobacterium leprae	ILLUMINA	2019-03-26	SRP183028	skin	skin
SAMN10851160	SRX5314690	4799	3282	SRR8511043	SRS4311557	GSM3585550	21	Tuberculoid Leprosy (TL)	male	RNA-Seq	51	PRJNA518047	GEO	public	sra	ncbi	0	Illumina HiSeq 2000	SINGLE	cDNA	TRANSCRIPTOMIC	2019-01-31	Mycobacterium leprae	ILLUMINA	2019-03-26	SRP183028	skin	skin
SAMN10851185	SRX5314691	4319	2742	SRR8511044	SRS4311558	GSM3585551	34	Tuberculoid Leprosy (TL)	female	RNA-Seq	51	PRJNA518047	GEO	public	sra	ncbi	0	Illumina HiSeq 2000	SINGLE	cDNA	TRANSCRIPTOMIC	2019-01-31	Mycobacterium leprae	ILLUMINA	2019-03-26	SRP183028	skin	skin
SAMN10851184	SRX5314692	5901	4246	SRR8511045	SRS4311559	GSM3585552	22	Tuberculoid Leprosy (TL)	male	RNA-Seq	51	PRJNA518047	GEO	public	sra	ncbi	0	Illumina HiSeq 2000	SINGLE	cDNA	TRANSCRIPTOMIC	2019-01-31	Mycobacterium leprae	ILLUMINA	2019-03-26	SRP183028	skin	skin
SAMN10851183	SRX5314693	4670	2966	SRR8511046	SRS4311560	GSM3585553	10	Tuberculoid Leprosy (TL)	male	RNA-Seq	51	PRJNA518047	GEO	public	sra	ncbi	0	Illumina HiSeq 2000	SINGLE	cDNA	TRANSCRIPTOMIC	2019-01-31	Mycobacterium leprae	ILLUMINA	2019-03-26	SRP183028	skin	skin
